Articles of interest in other COB journals

From *Journal of Cell Science*

**Ral-regulated interaction between Sec5 and paxillin targets Exocyst to focal complexes during cell migration**

Krystle S. Spiczka and Charles Yeaman

Spiczka, K. S. and Yeaman, C. 2008. *J. Cell Sci.* doi: 10.1242/jcs.031641

**Canonical Wnt signalling induces satellite-cell proliferation during adult skeletal muscle regeneration**

Anthony Otto, Corina Schmidt, Graham Luke, Steve Allen, Petr Valasek, Francesco Muntoni, Diana Lawrence-Watt and Ketan Patel

Otto, A. et al. 2008. *J. Cell Sci.* doi: 10.1242/jcs.026534
